# Supplementary material for: Mycobacterium tuberculosis Thymidylyltransferase RmlA Is Negatively Regulated by Ser/Thr Protein Kinase PknB
Source: PubMed Central journal article supplement (PMC8044546; doi:10.3389/fmicb.2021.643951), 2021-03-31
Supplement: Data_Sheet_1.pdf [file Data_Sheet_1.pdf]

## Supplemental Figures and Figure legends

**Figure S1. Validation of the interaction between PknB with RmlA.** (A) Validation of the interaction between PknB with RmlA using BLI *in vitro*. (B) Validation of the interaction between PknB with RmlA using Y2H *in vivo*.

**Figure S2. Validation of the kinases activities with autophosphorylation.** Some of the kinases were purified with His tag in *E. coli*. The kinase reaction was carried out at 37°C for 2 h, and then detected with immune-blotting by anti-ser/thr phosphorylation antibody.

**Figure S3. The phosphorylated sites on RmlA by PknB were identified with mass spectrometry.**

**Figure S4. Construction PknB knock down strain in *M.sm*.** (A) Designed sgRNAs targeting the non-template (NT) strand within the open reading frame (ORF) of *pknB*. (B) PAM sequences used in the study. (C) sgRNAs targeting *pknB* were co-expressed with dCas9<sup>Sth1</sup> (+ATc). Gene knockdown was quantified by qRT-PCR. The experiment was performed in triplicates (n = 3). Error bars indicate standard error of mean. Asterisk indicates significance difference (P value < 0.05).

**Figure S5. The enzymatic activities of RmlA mutants.** 4 µg purified RmlA and mutants were added to 50 µL of enzyme reaction buffer (50 mM Tris (pH 7.5), 1 mM dithiothreitol, 5 mM MgCl<sub>2</sub>, 0.2 mM dTTP, 1 mM D-Glc-1-P), and incubation at 37°C for 1 h.

**Figure S6. Construction of rmlA mutants in *M.sm*.** A, Schematic representation of the homologous recombination. A suicide phasmid pMZ(+) containing *rmlA* and carrying the mutations T12A or T12D, a hyg resistance cassette, the upstream and downstream 800 bp of *rfbA* were used to transduce into *M.sm*. B, PCR amplification of *rmlA* sequence. The length of wild type *M.sm* is about 2 kb, while mutation strains which containing hyg cassette, are about 3.5 kb. C, Mutations were confirmed by sequencing. D, Immunoblotting. Western blot analysis showing the expression level of RmlA with His tag in the crude lysates of the parental strain and the various RmlA mutant strains. E, Detection the growth of wild type and mutants of RmlA. All the strains were seed fresh cultures at an initial OD<sub>600</sub> of 0.1, and the growth was monitored for 2 days at interval of 6 h. The experiment was performed in triplicates (n = 3). Error bars indicate standard error of mean (P value <0.05).

## Supplemental Tables

**Table S1.** Bacteria strains and plasmids used in this study.

**Table S2.** Primers used in this study.

A

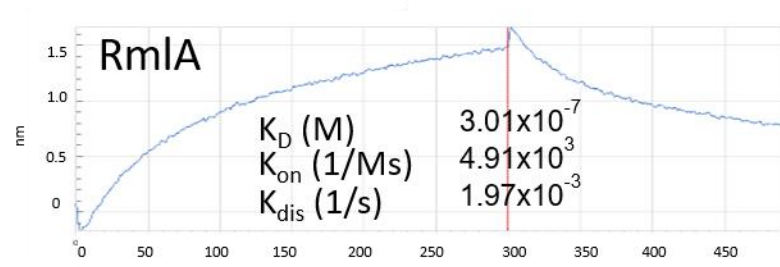

B

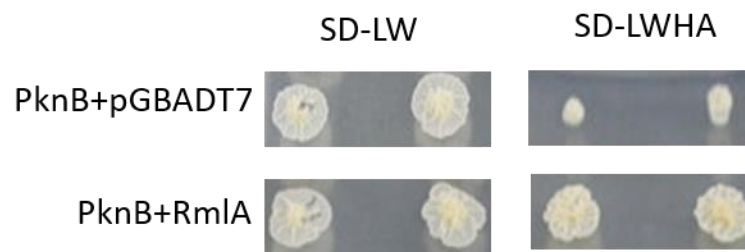

Qu et. al., Figure S1.

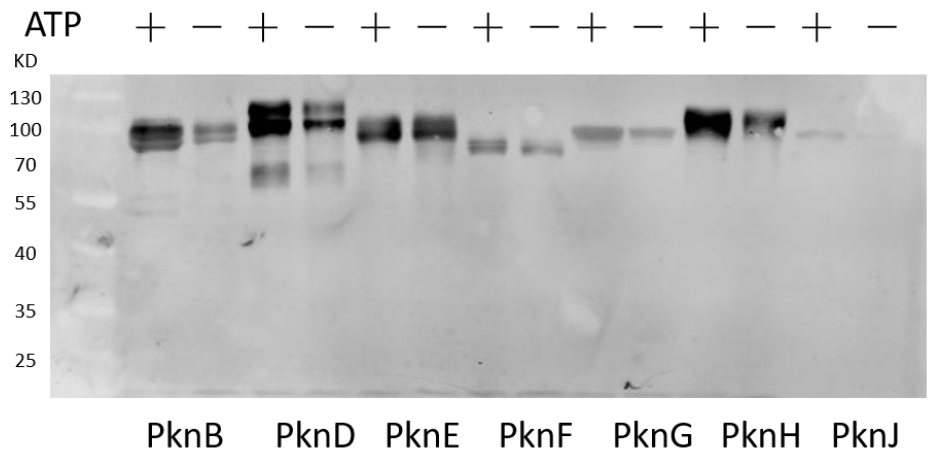

**Anti-Ser/Thr phosphorylation  
antibody**

**Qu et. al., Figure S2.**

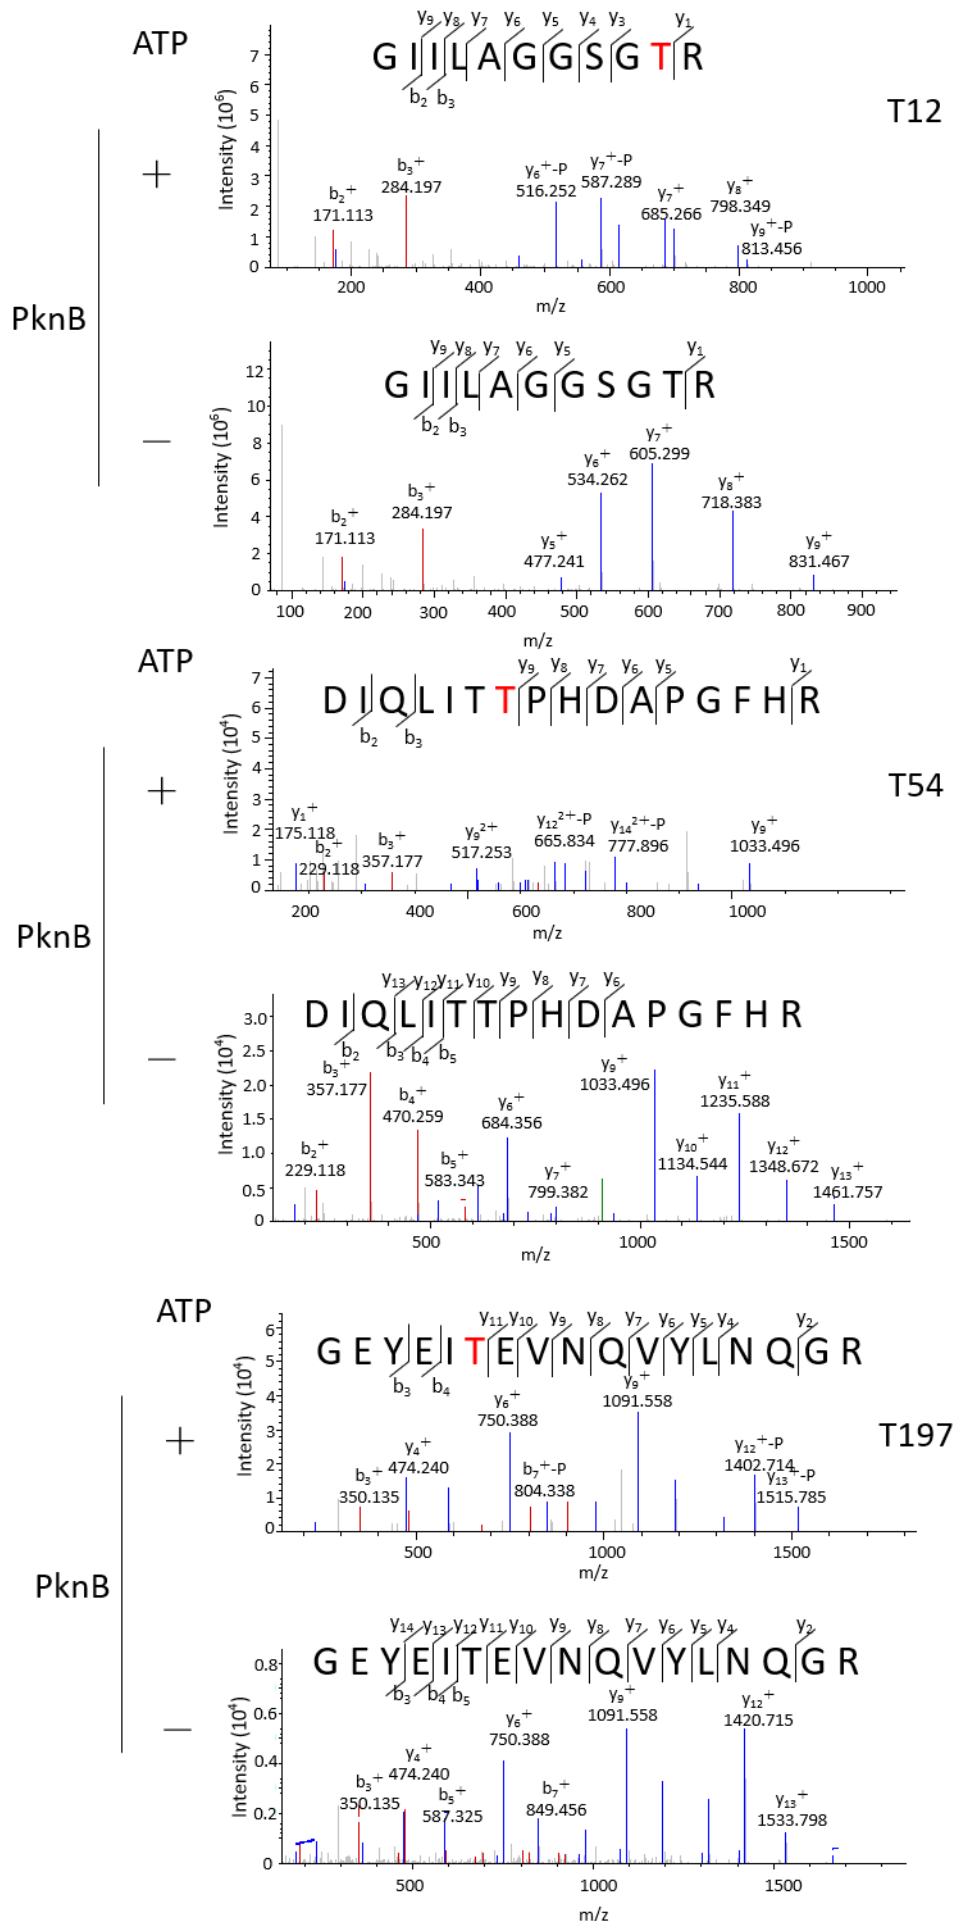

Qu et. al., Figure S3.

A

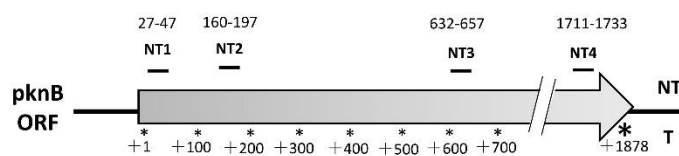

B

| NT  | PAM     |
|-----|---------|
| NT1 | NNGGAAA |
| NT2 | NNAGAAG |
| NT3 | NNAGGAT |
| NT4 | NNAGAAC |

C

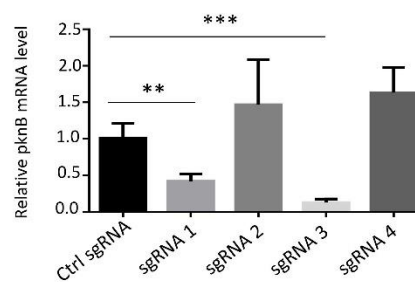

Qu et. al., Figure S4.

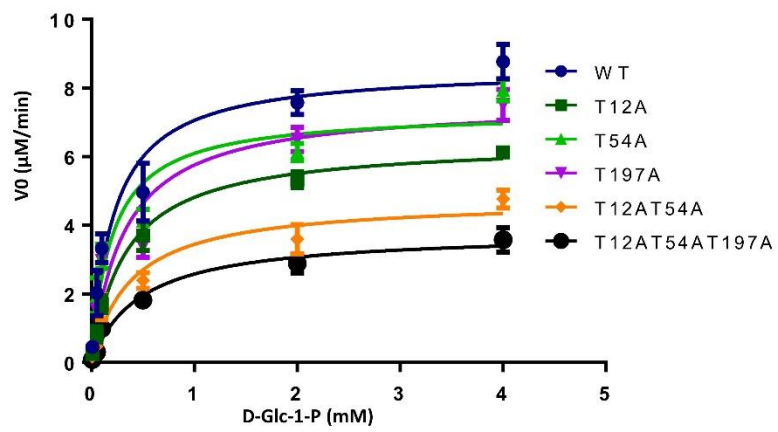

Qu et. al., Figure S5.

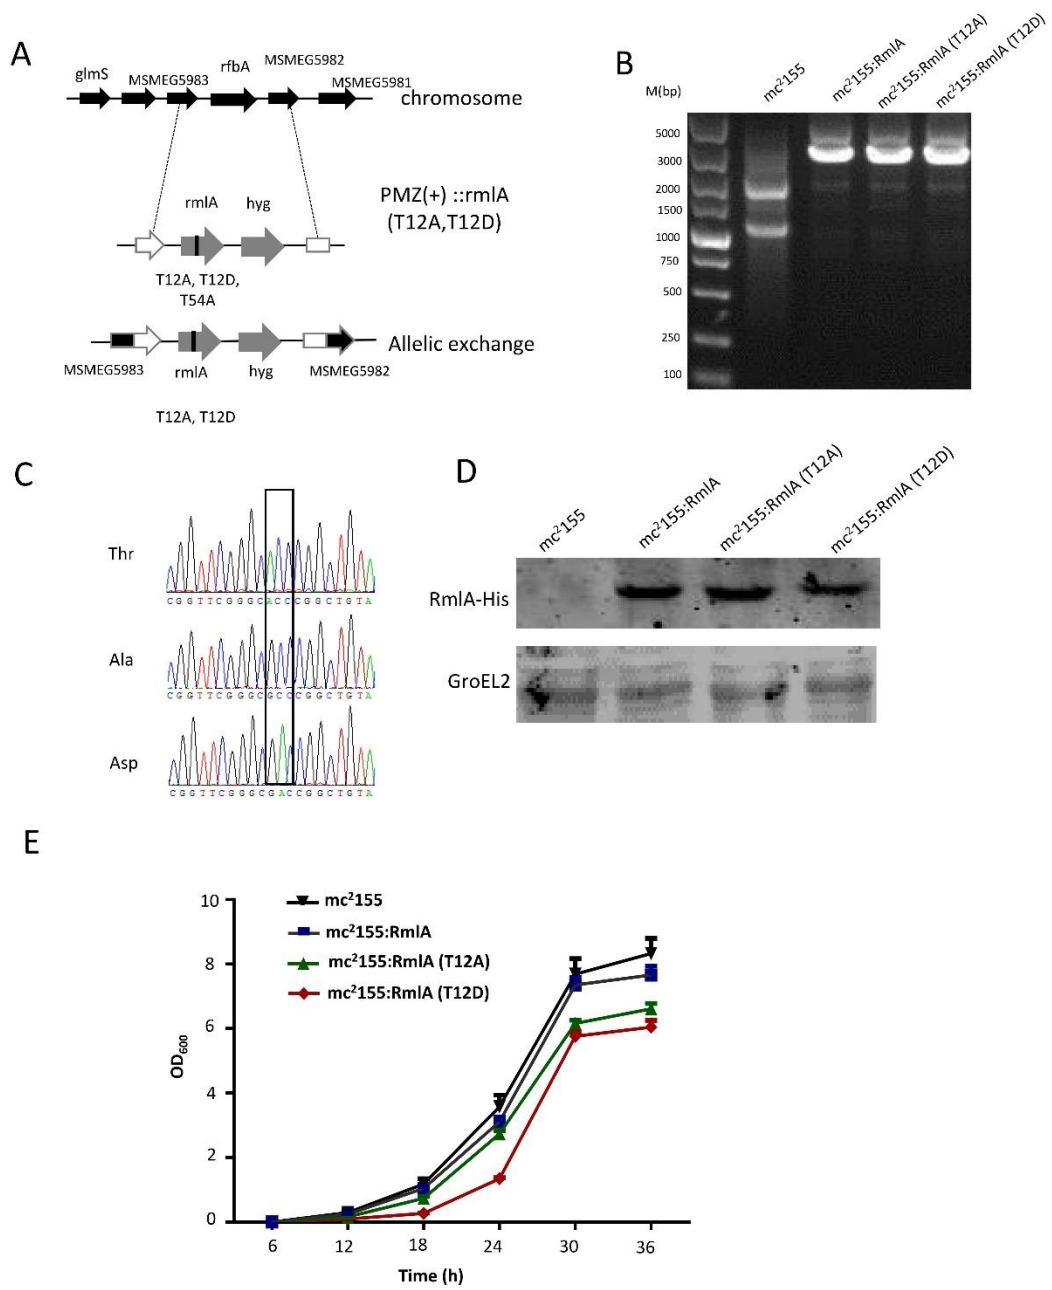

Qu et. al., Figure S6.
